# Supplementary material
Source: PubMed Central journal article supplement (PMC3153515)
Supplement: supp_101408_bpa-vandenberg-1-at.pdf [file supp_101408_bpa-vandenberg-1-at.pdf]

**Appendix 1: Urine concentrations of bisphenol A in reference populations from Canada, the United States, Germany and China.** (A) Unadjusted geometric mean urine concentrations by age group. (B) Urinary concentrations of bisphenol A were adjusted for creatinine to control for differences in volume of urine output. No corrected values were reported for the German reference population. Error bars indicate the 95% confidence intervals. BPA = bisphenol A. The data in this figure are taken from Calafet et al.,<sup>1</sup> Becker et al.,<sup>2</sup> He et al.<sup>3</sup> and Bushnik et al.<sup>4</sup>

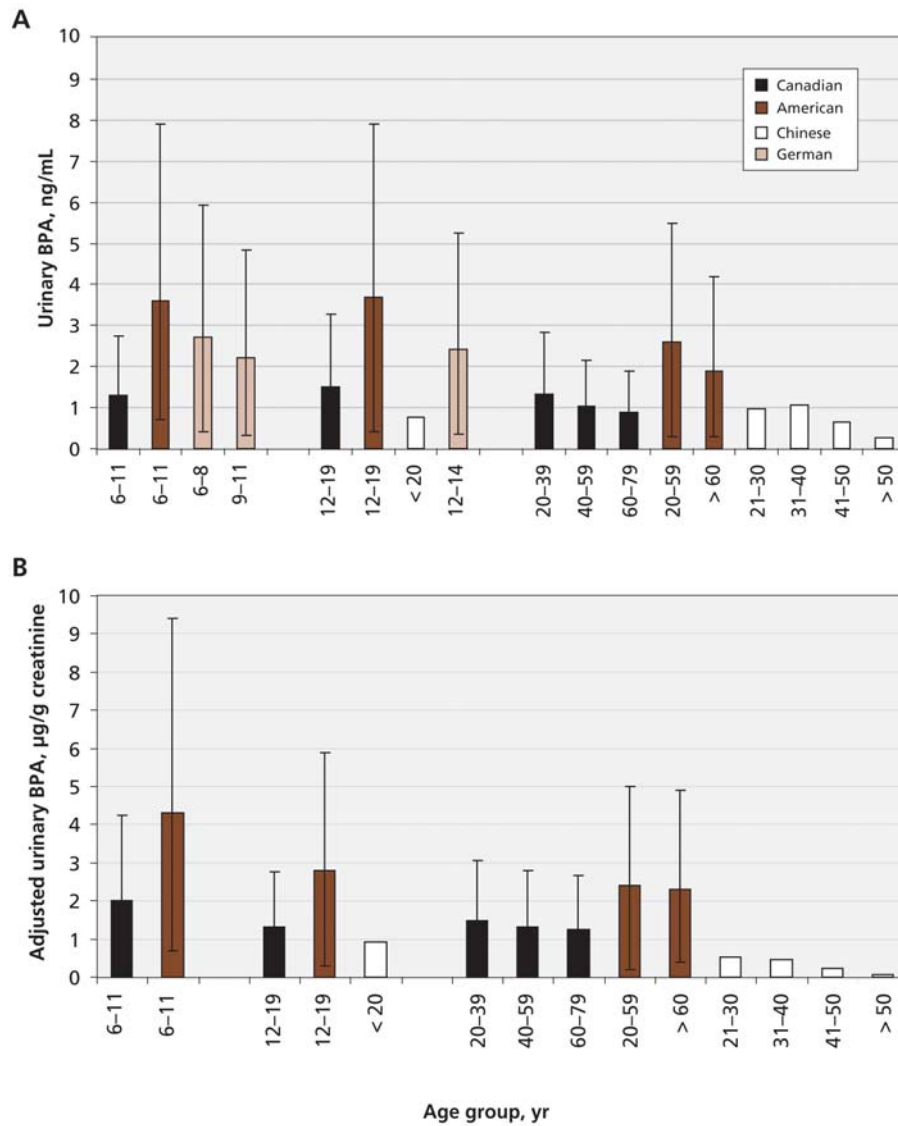

## References

1. Calafat AM, Ye X, Wong LY, et al. Exposure of the U.S. population to bisphenol A and 4-tertiary-octylphenol: 2003–2004. *Environ Health Perspect* 2008;116:39-44.
2. Becker K, Göen T, Seiwert M, et al. GerES IV. Phthalate metabolites and bisphenol A in urine of German children. *Int J Hyg Environ Health* 2009;212:685-92.
3. He Y, Miao M, Herrinton LJ, et al. Bisphenol A levels in blood and urine in a Chinese population and the personal factors affecting the levels. *Environ Res* 2009;109:629-33.
4. Bushnik T, Haines D, Levallois P, et al. Lead and bisphenol A concentrations in the Canadian population. *Health Rep* 2010;21:7-18.
